# Supplementary material
Source: publisher site journal article supplement (https://www.dovepress.com/article/287346)
Supplement: Supplementary file 1 [file get_supplementary_file.php]

**Supplementary data**


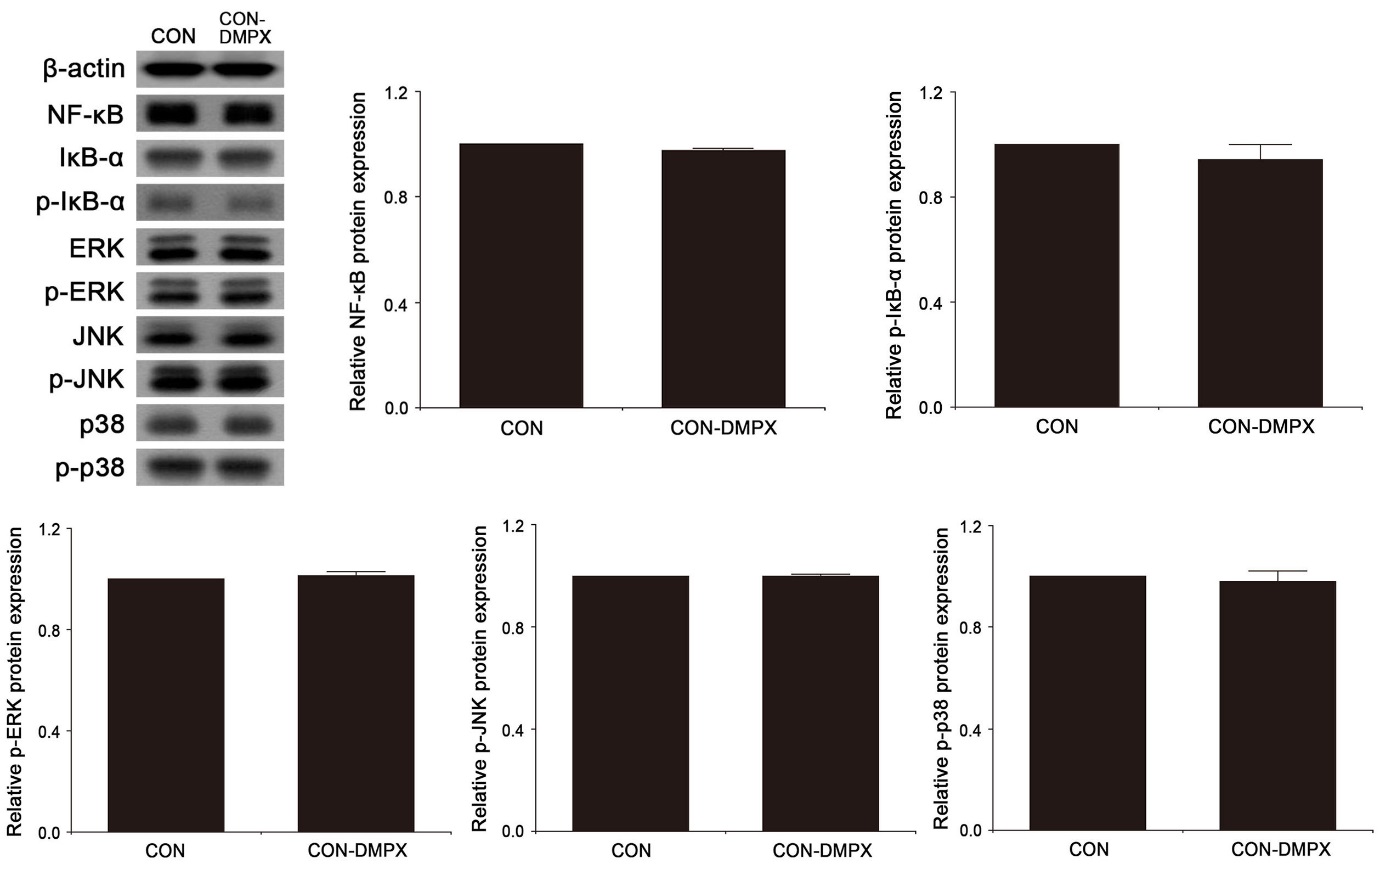


**Figure S1** Changes in the expression of NF-κB, IκB-α, and cascade factors of MAPK according to DMPX administration. Upper left panel: Representative expressions of NF-κB, IκB-α, ERK, JNK, p-38. Upper right panel: Relative expression of NF-κB and relative ratio of p-IκB-α to IκB-α. Lower panel: Relative ratio of p-ERK to ERK, p-JNK to JNK, and p-p38 to p38.


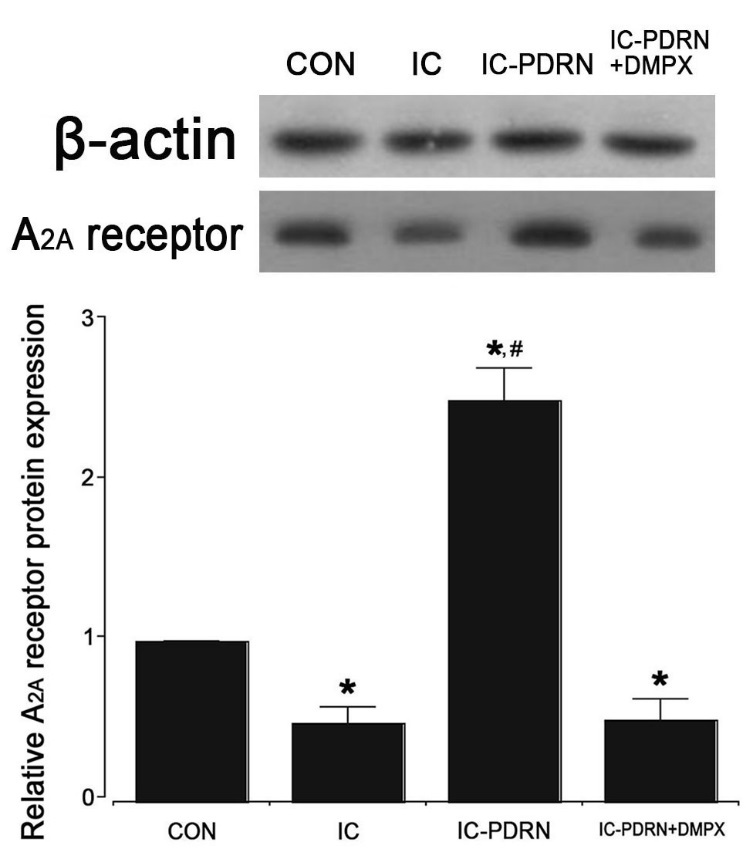


**Figure S2** Relative of adenosine A2A receptor protein in the bladder tissue.* Indicates P < 0.05 when compared with the control group. # Indicates P < 0.05 compared with the IC-induced group.
